# Supplementary material
Source: publisher figshare collection journal article supplement (https://karger.figshare.com/ndownloader/files/15520472)
Supplement: Supplementary file 1 [file 15520472]

**Supplementary materials**  
**Journal of Molecular Microbiology and Biotechnology**

**Comparison of DNA extraction efficiency and reproducibility of different aeration diffuser  
biofilms using bead beating protocol**

Pitiporn Asvapathanagul<sup>a\*</sup>, Manel Garrido-Baserba<sup>b,c</sup>, Betty H Olson<sup>b,c</sup>, Hee-Dung Park<sup>d</sup>, Deqiang Chen<sup>e</sup> and Diego Rosso<sup>b,c</sup>

<sup>a</sup> Department of Civil Engineering and Construction Engineering Management, California State University, Long Beach, CA90840-5101, USA

<sup>b</sup> Department of Civil and Environmental Engineering, University of California, Irvine, CA 92697-2175, USA

<sup>c</sup> Water-Energy Nexus Center, University of California, Irvine, CA92697-2175, USA

<sup>d</sup> School of Civil, Environmental and Architectural Engineering, Korea University, Seoul 136713, Korea

<sup>e</sup> College of Environment, Hohai University, Nanjing, 210098, PR China

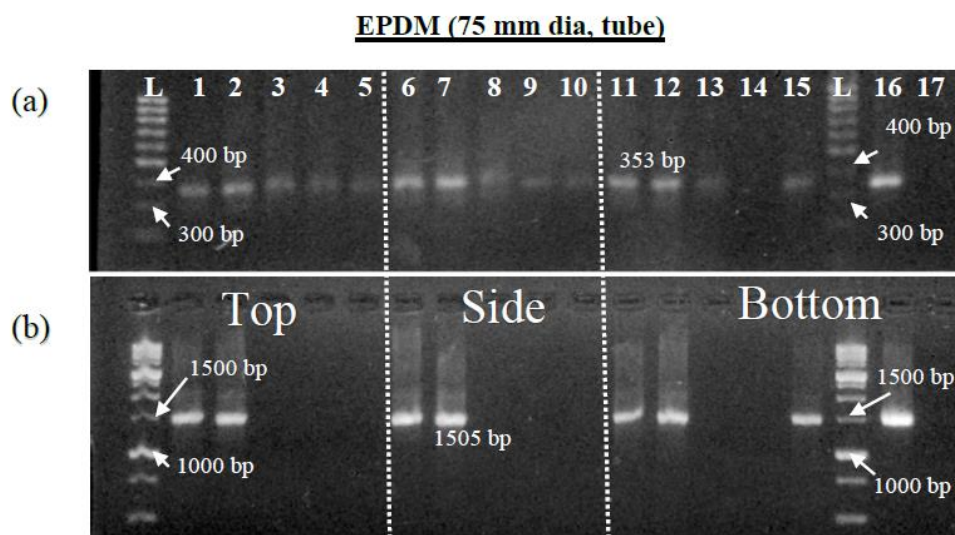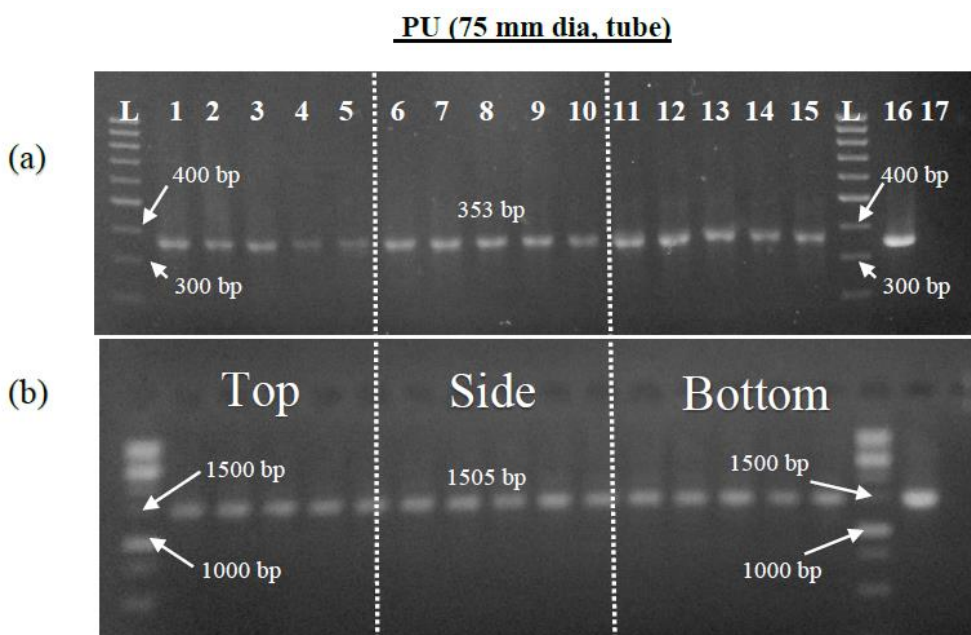

**Fig. S1A.** Images of gel electrophoresis of the PCR amplicons produced from two fragment sizes (353 bp and 1505 bp) using DNA extracts from EPDM and Polyurethane, 75 mm dia. Tube Membranes. L indicates 100 bp ladder (a) and 1000 bp ladder (b). Each grouping, lanes 1-5, 6-10, and 11-15, corresponds to the PCR amplicons from bead beatings 1-5, respectively. Lane 16, positive control; lane 17, negative control (HPLC water).

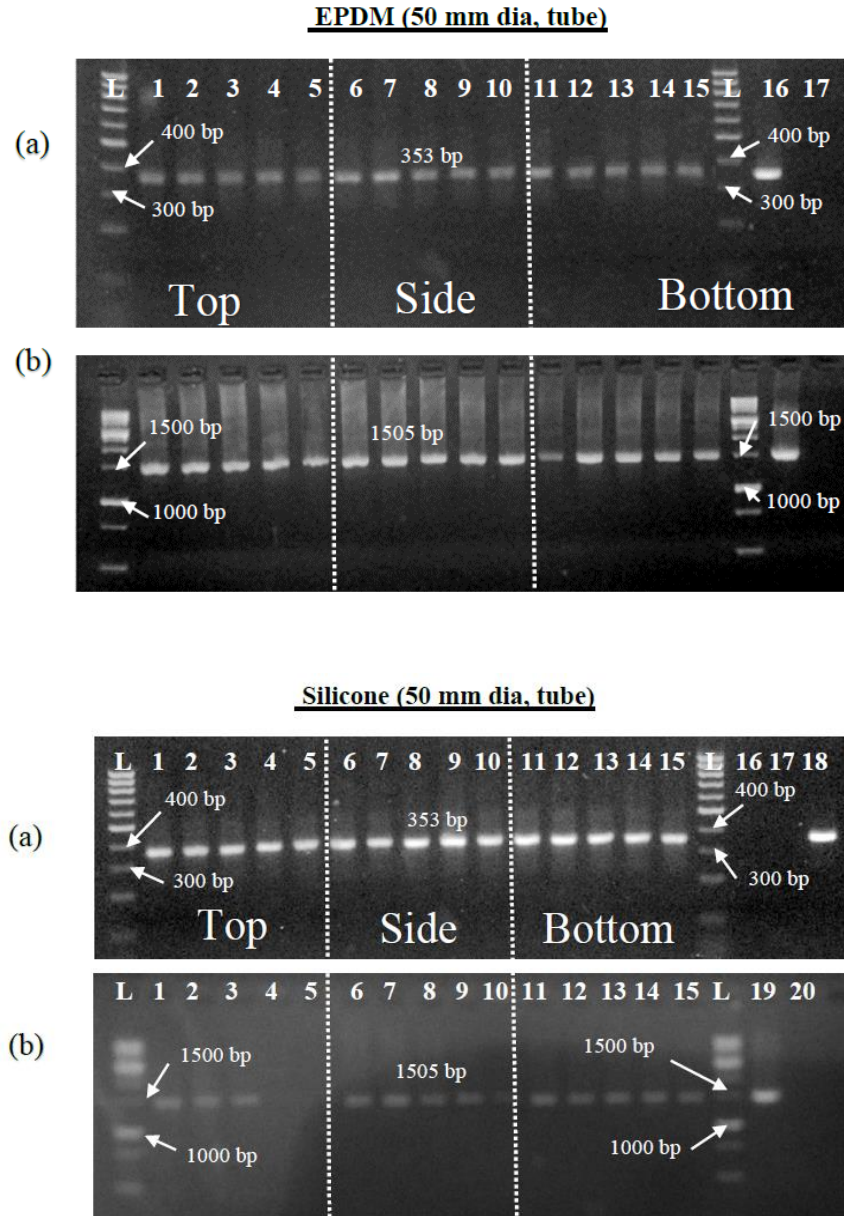

**Fig. S1B.** Images of gel electrophoresis of the PCR amplicons produced from two fragment sizes (353 bp and 1505 bp) using DNA extracts from EPDM and Silicone, 50 mm dia. Tube Membranes. L indicates 100 bp ladder (a) and 1000 bp ladder (b). Each grouping, lanes 1-5, 6-10, and 11-15, corresponds to the PCR amplicons from bead beatings 1-5, respectively. For EPDM (50 mm dia) lane 16, positive control; lane 17, negative control (HPLC water); and for Silicone (50 mm dia) lane 16, 17 and 20, negative control (HPLC water); lane 18 and 19, positive control

### EPDM disc and ceramic disc (230 mm dia, disc)

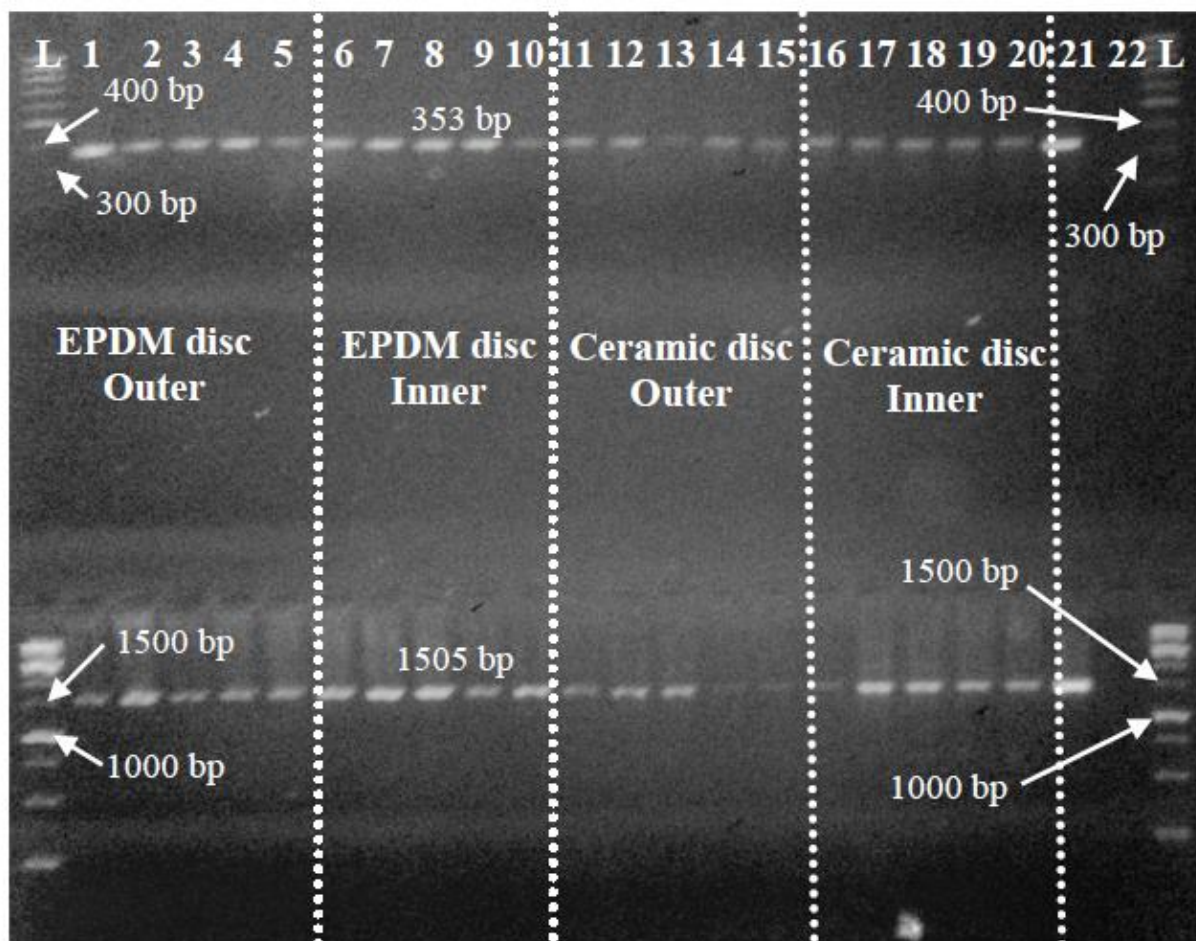

**Fig. S1C.** Images of gel electrophoresis of the PCR amplicons produced from two fragment sizes (353 bp and 1505 bp) using DNA extracts from EPDM and Ceramic, 230 mm dia. Disc Membranes. L indicates 100 bp ladder (a) and 1000 bp ladder (b). Each grouping, lanes 1-5, 6-10, 11-15, and 16-20 corresponds to the PCR amplicons from bead beatings 1-5, respectively. Lane 21, positive control; lane 22, negative control (HPLC water).

**A. *E. coli***

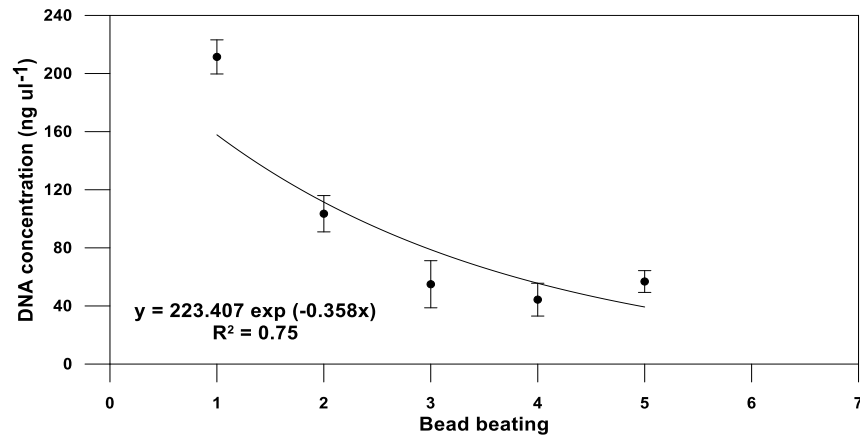

**B. *G. amarae***

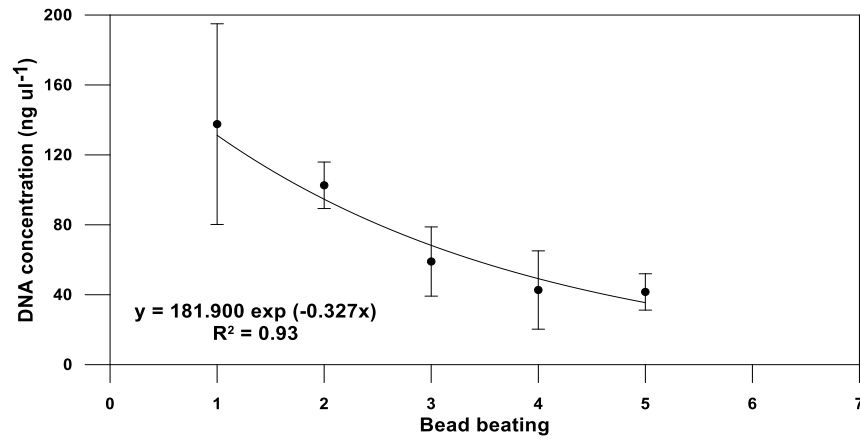

**C. Mixed liquor**

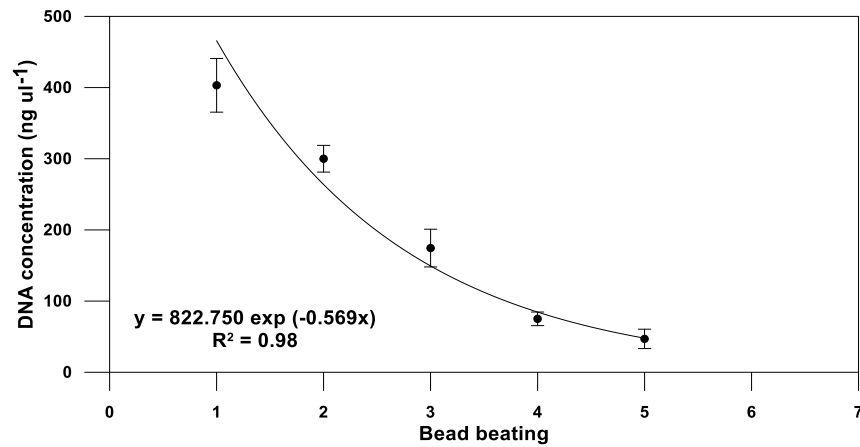

**Fig. S2.** DNA extract produced during each bead beating for *E. coli* (a), *G. amarae* (b) and mixed liquor (c) using the first order decay model

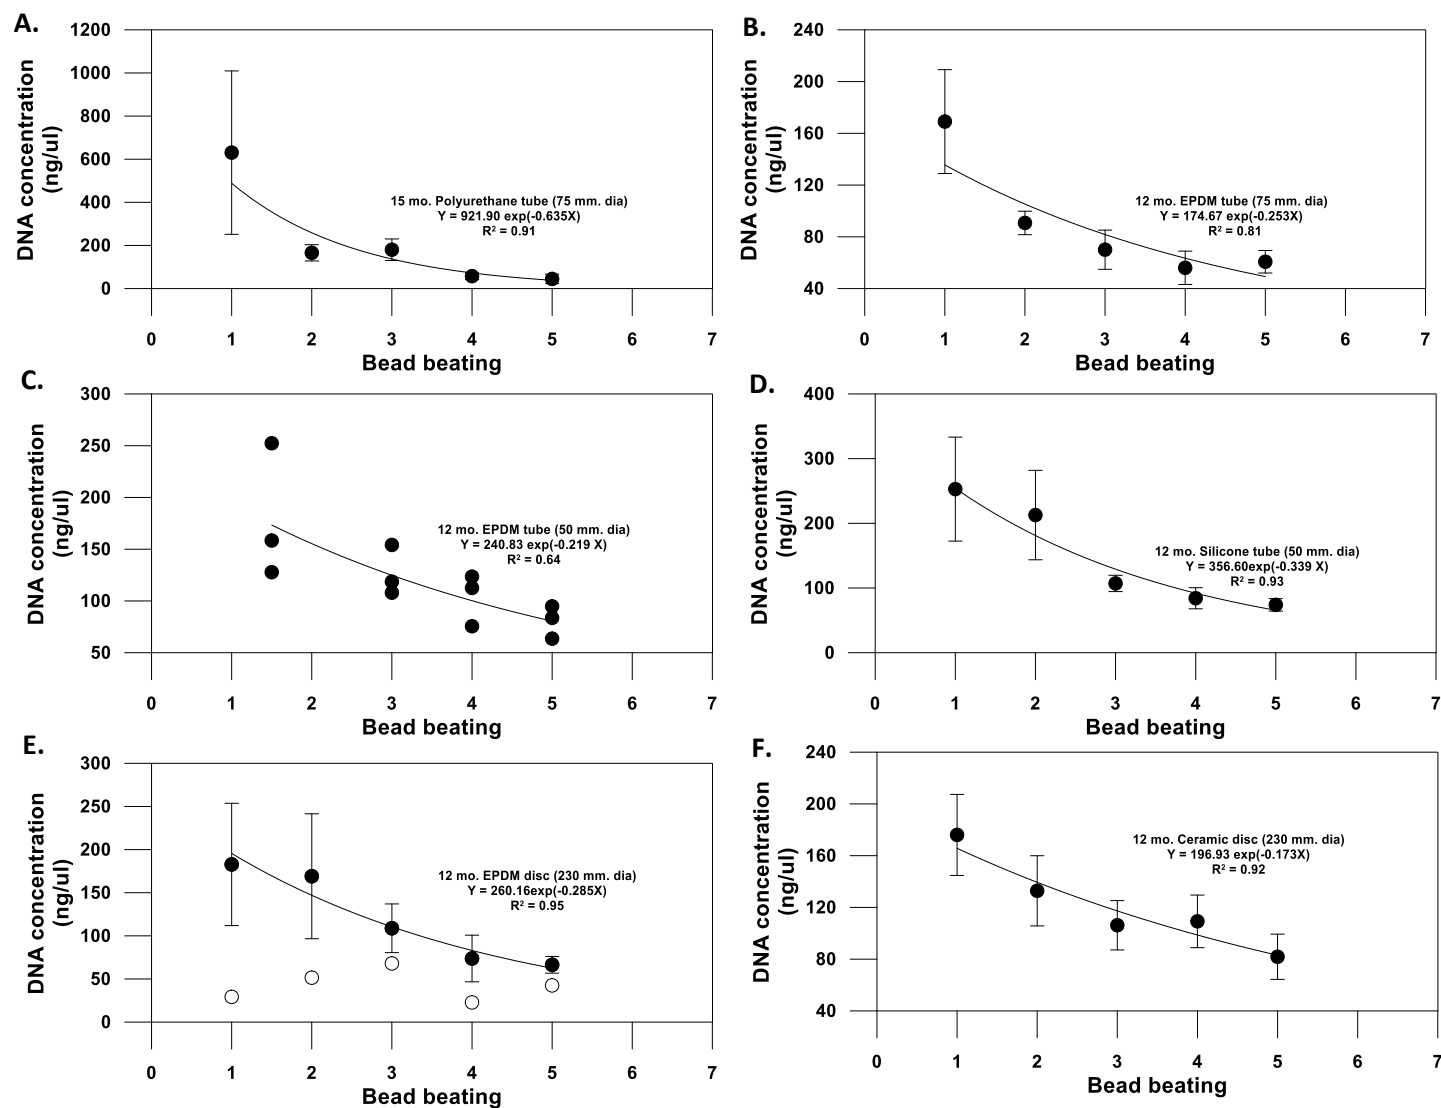

**Fig. S3.** The biofilm DNA extract produced during each bead beating using the first order decay model. Open circles indicating DNA yielded from inner location of the EPDM ceramic disc.

**A.**

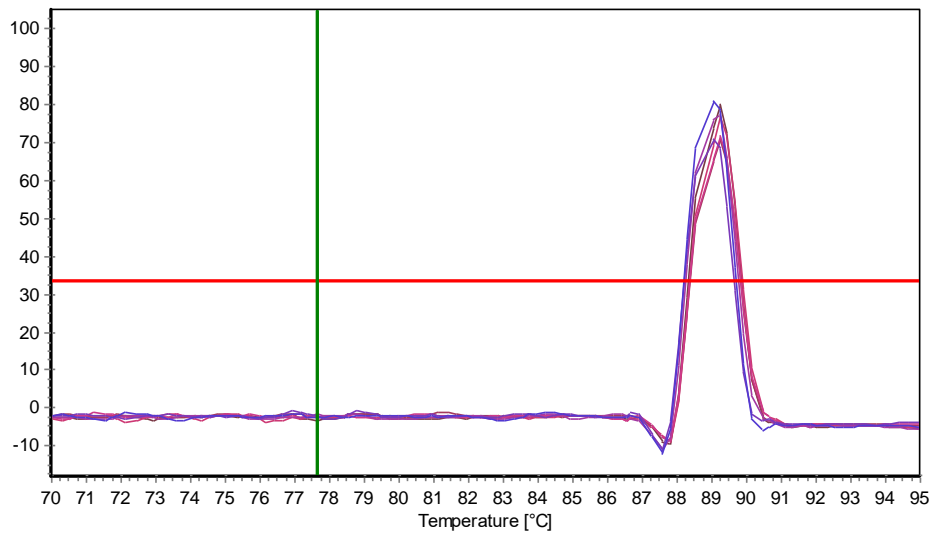

Threshold: 33%

**B.**

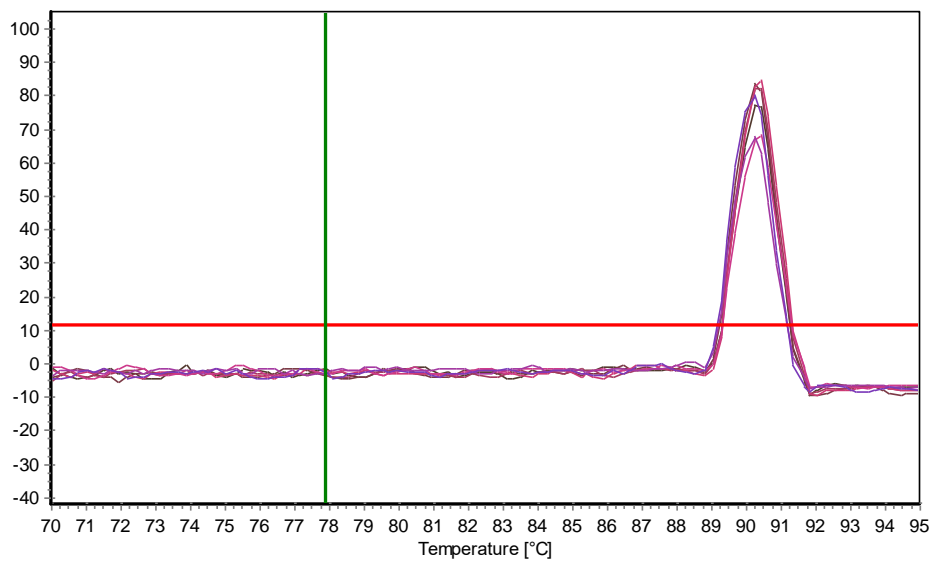

Threshold: 12%

C.

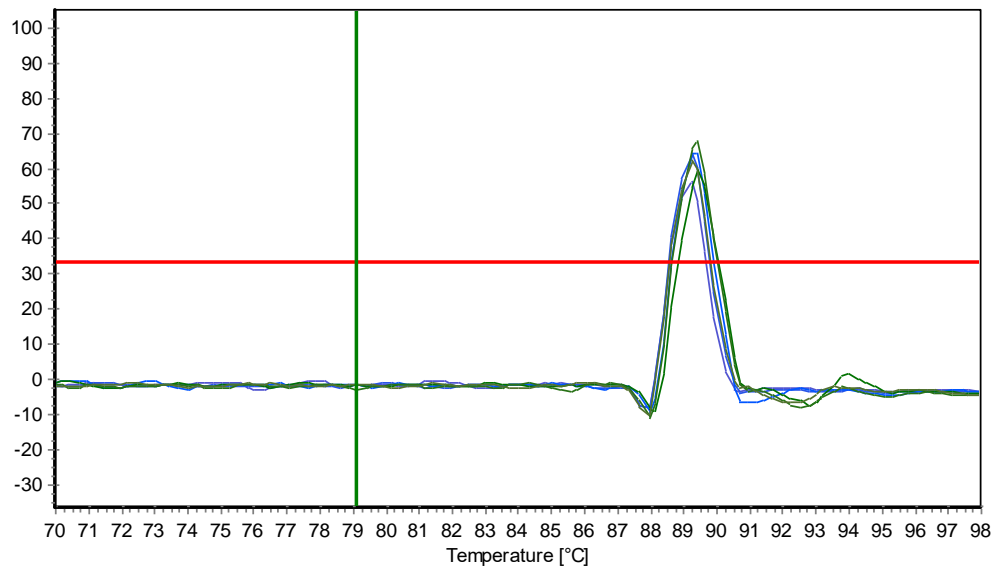

Threshold: 33%

D.

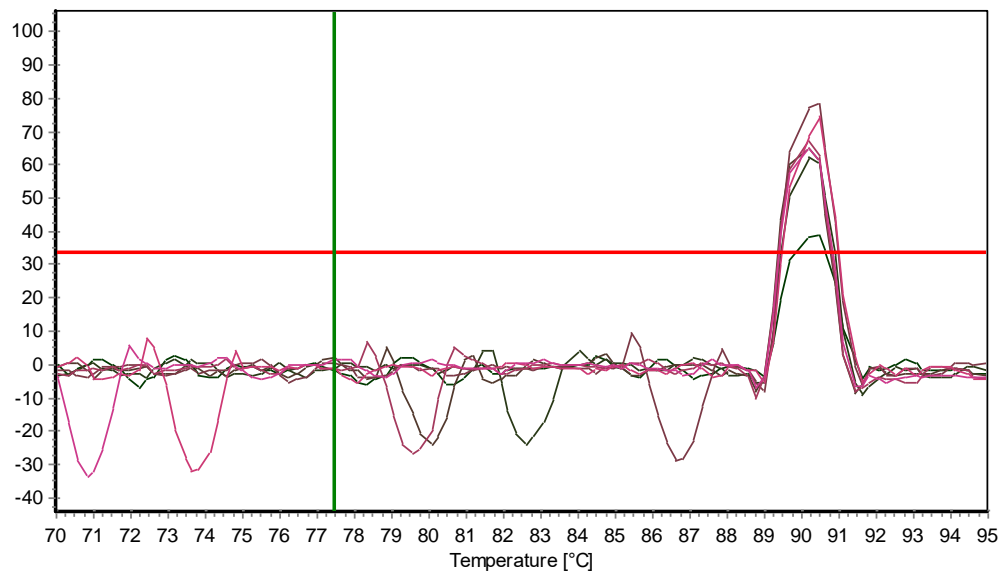

Threshold: 33%

**Fig. S4.** The 353 bp and 1505 bp amplicons melt curve analysis for *E. coli* (A and B) and *G. amarae* (C and D) extracts



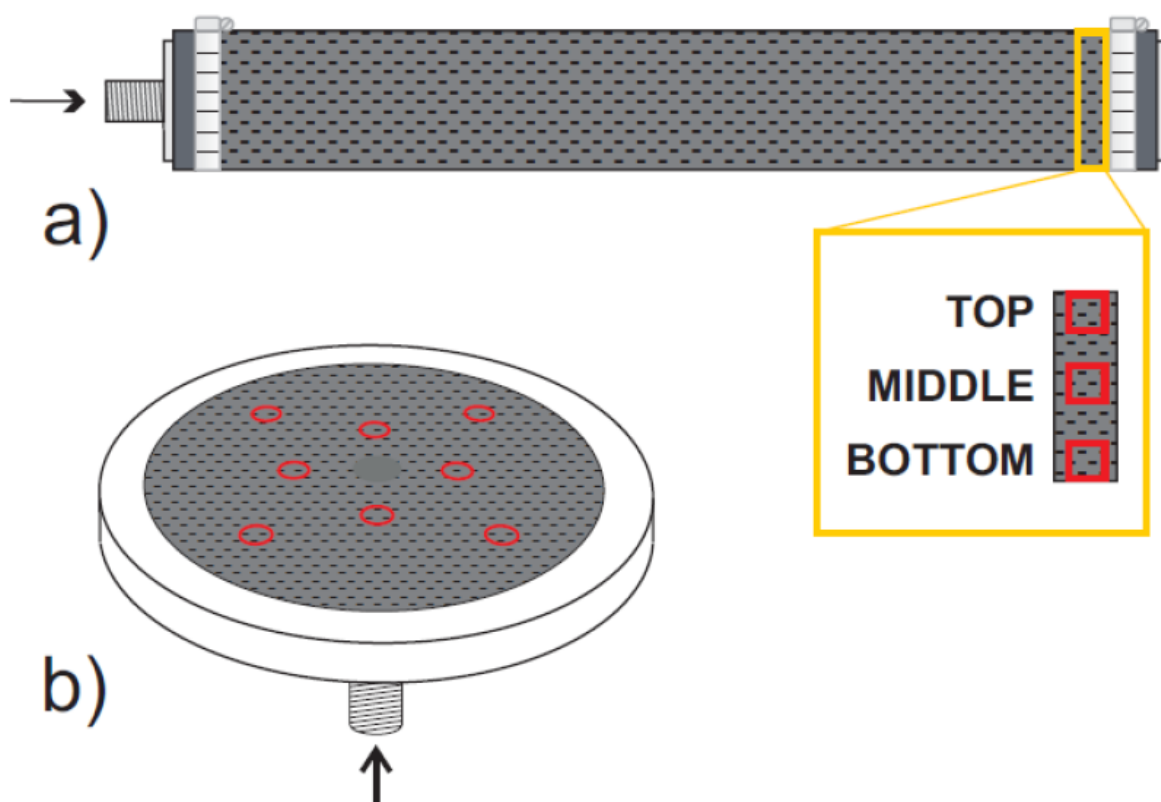

**Fig. S5.** Diffusers and fouling biofilm sampling for a) tube diffusers and b) disc diffusers
